# Supplementary material for: Evaluation of Paired-End Sequencing Strategies for Detection of Genome Rearrangements in Cancer
Source: PubMed Central journal article supplement (PMC2278375; doi:10.1371/journal.pcbi.1000051), 2008-04-25
Supplement: pcbi.1000051.s009.pdf [file pcbi.1000051.s009.pdf]

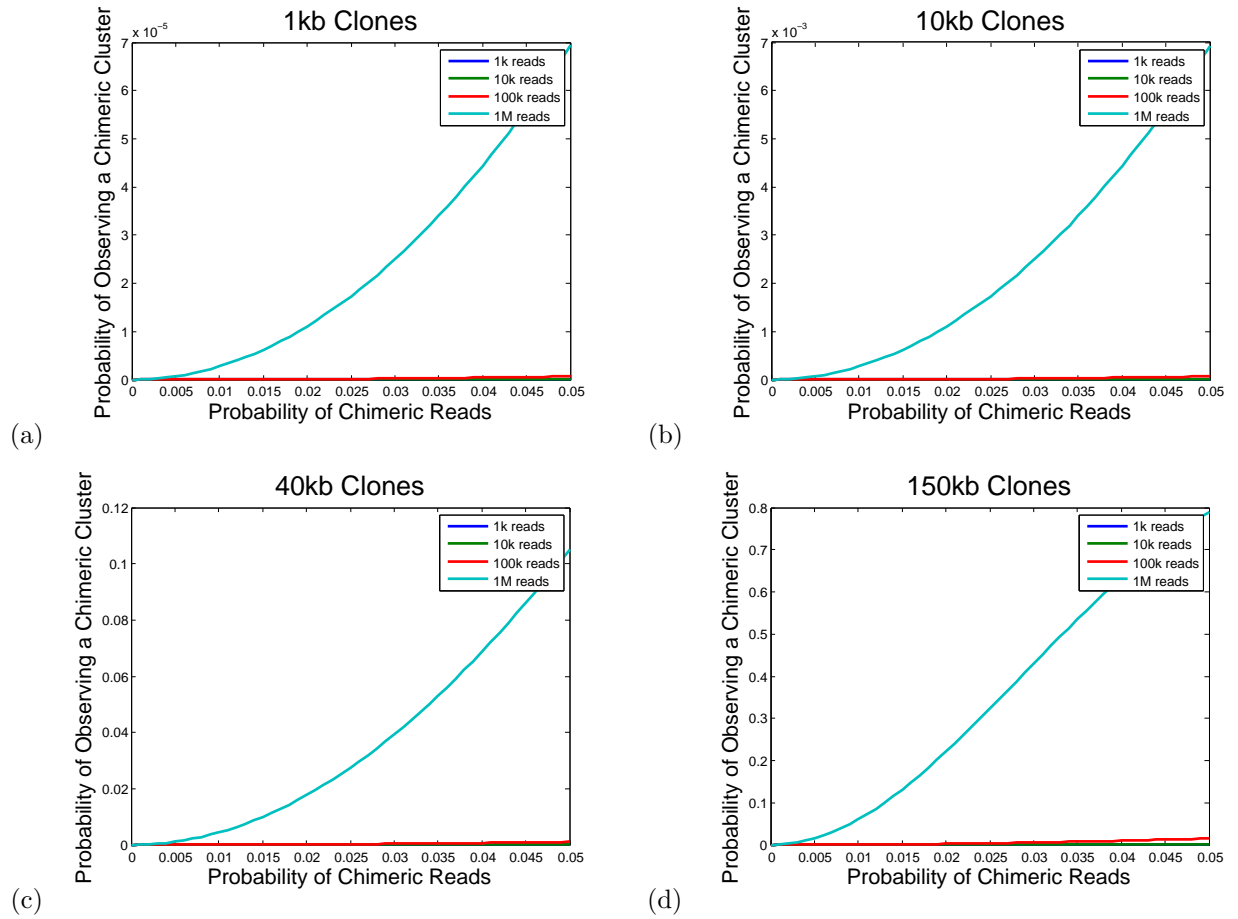

Figure 8: **Effect of chimeric clones.** Probability of observing at least one chimeric cluster vs. the percent of chimeric clones under equal number of paired reads indicates lower chimerism for smaller clones. (a) 1kb clones, (b) 10kb clones, (c) 40kb clones, and (d) 150kb clones.
