# Supplementary material for: Evaluation of Paired-End Sequencing Strategies for Detection of Genome Rearrangements in Cancer
Source: PLOS journal article supplement (doi:10.1371/journal.pcbi.1000051), 2008-04-24
Supplement: S3 (10.1371/journal.pcbi.1000051.s003) [file journal.pcbi.1000051.s003]

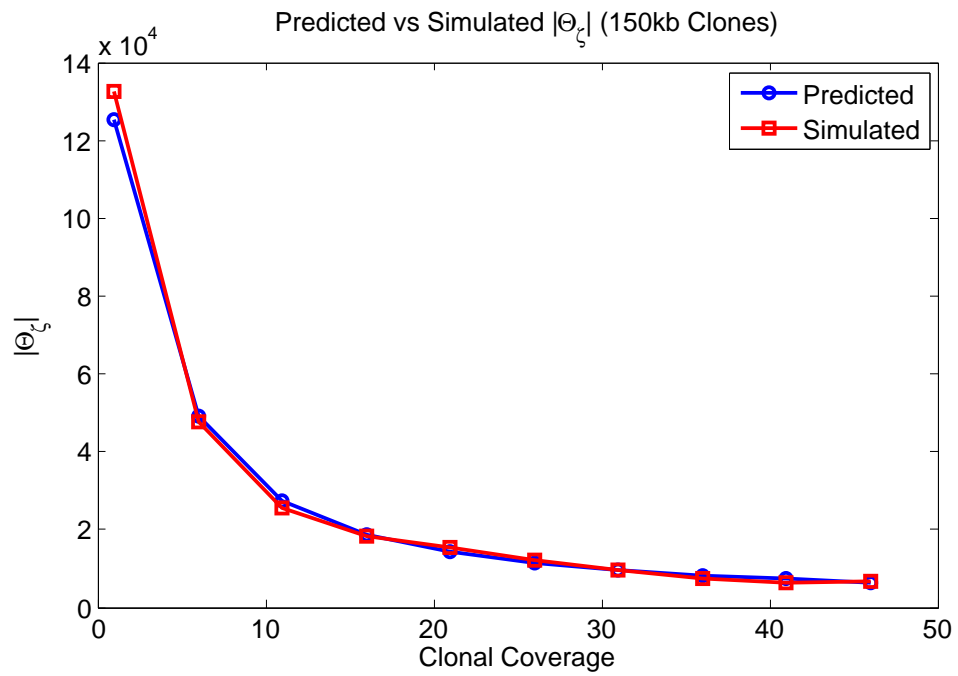

Figure 2: **Length of a breakpoint region (BPR) for varying amounts of clonal coverage.** The blue curve shows the expected length (Equation 5), while the red curve is the average observed length over 50 simulations.
