# Supplementary material for: Evaluation of Paired-End Sequencing Strategies for Detection of Genome Rearrangements in Cancer
Source: PLOS journal article supplement (doi:10.1371/journal.pcbi.1000051), 2008-04-24
Supplement: S4 (10.1371/journal.pcbi.1000051.s004) [file journal.pcbi.1000051.s004]

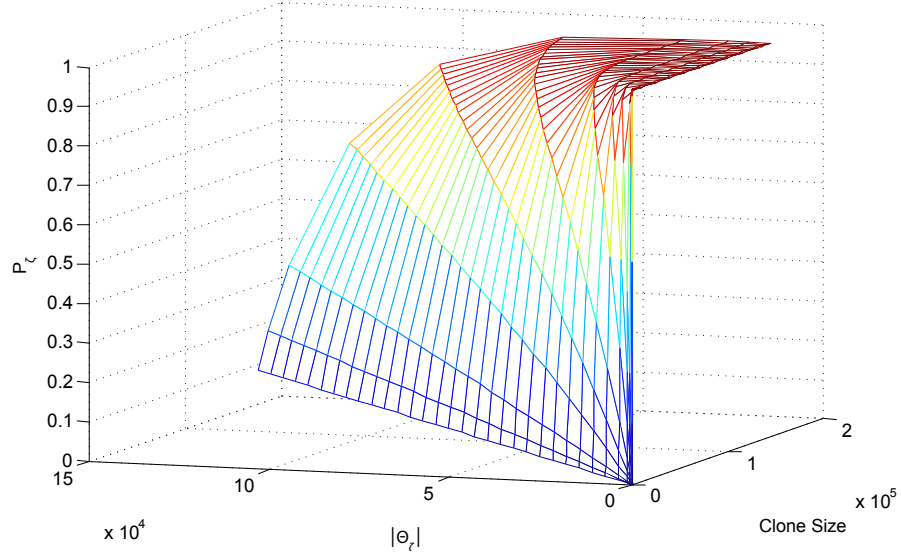

(a)

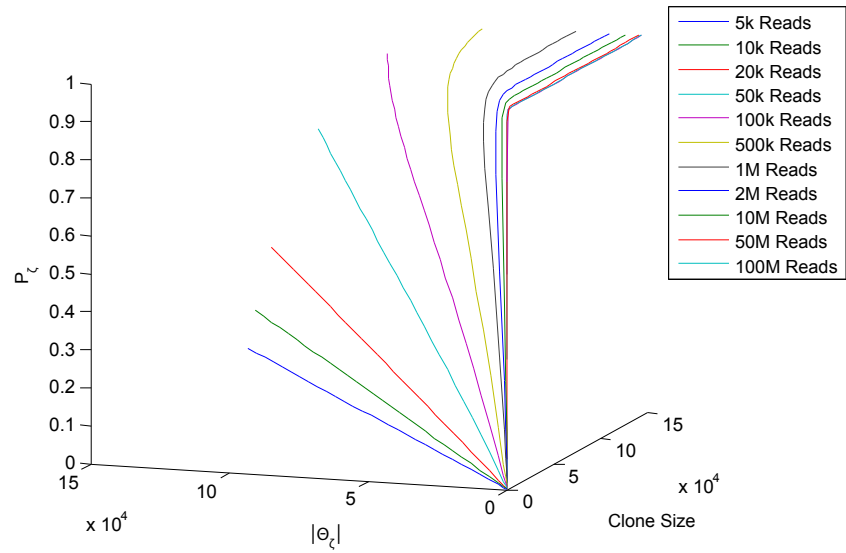

(b)

Figure 3: **Clone length vs.  $P_\zeta$  vs.  $|\Theta_\zeta|$  for varying  $N$ .** A clear trade-off can be observed. Larger clone lengths yield higher  $P_\zeta$  (detection probability), compared to smaller clone lengths, which have the advantage of better localization (smaller  $|\Theta_\zeta|$ ). Different lines originating from 0 refer to different number of reads. As the number of reads grows, the trade-off converges to high detection, and better localization. (a) shows values in a mesh graph, while (b) shows raw values.
