# Supplementary material for: Evaluation of Paired-End Sequencing Strategies for Detection of Genome Rearrangements in Cancer
Source: PLOS journal article supplement (doi:10.1371/journal.pcbi.1000051), 2008-04-24
Supplement: S7 (10.1371/journal.pcbi.1000051.s007) [file journal.pcbi.1000051.s007]

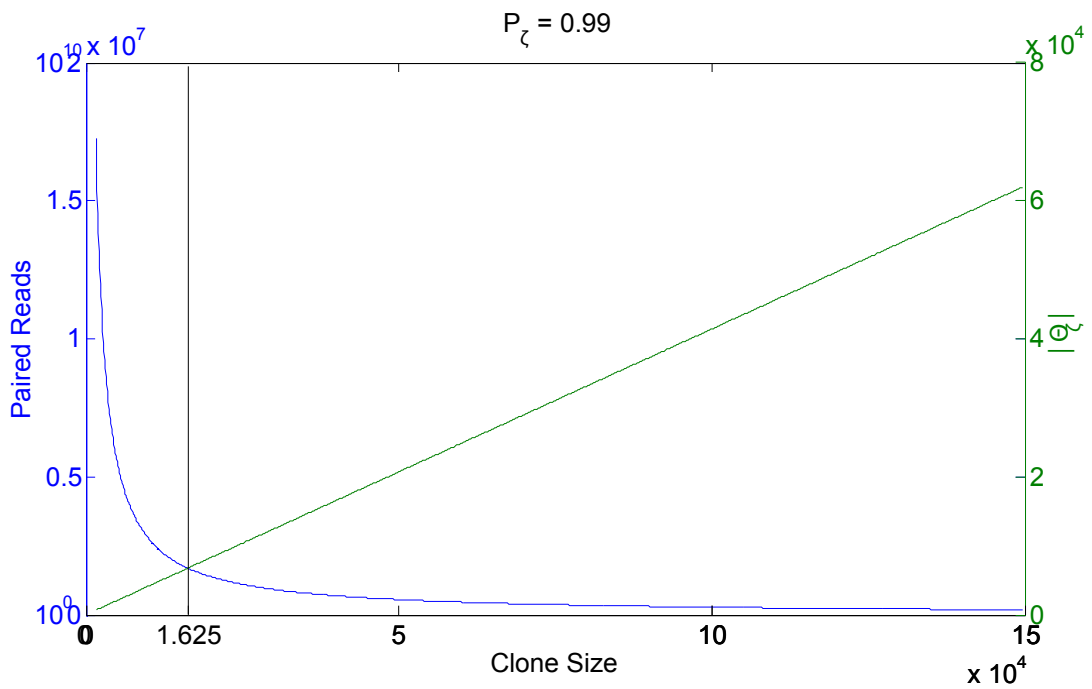

Figure 6: **The number of paired-reads (and resulting  $E(|\Theta_{\zeta}|)$ ) needed to obtain a  $P_{\zeta}$  of 0.99 for clone lengths varying from 1 to 150kb.** The x-axis indicates clone length,  $L$ , the y-axis indicates reads,  $N$ , and the alternate y-axis shows  $|\Theta_{\zeta}|$ . The vertical line indicates the intersection point between the two lines at  $\sim 16000$ bp.
