# Supplementary material for: Evaluation of Paired-End Sequencing Strategies for Detection of Genome Rearrangements in Cancer
Source: PLOS journal article supplement (doi:10.1371/journal.pcbi.1000051), 2008-04-24
Supplement: S8 (10.1371/journal.pcbi.1000051.s008) [file journal.pcbi.1000051.s008]

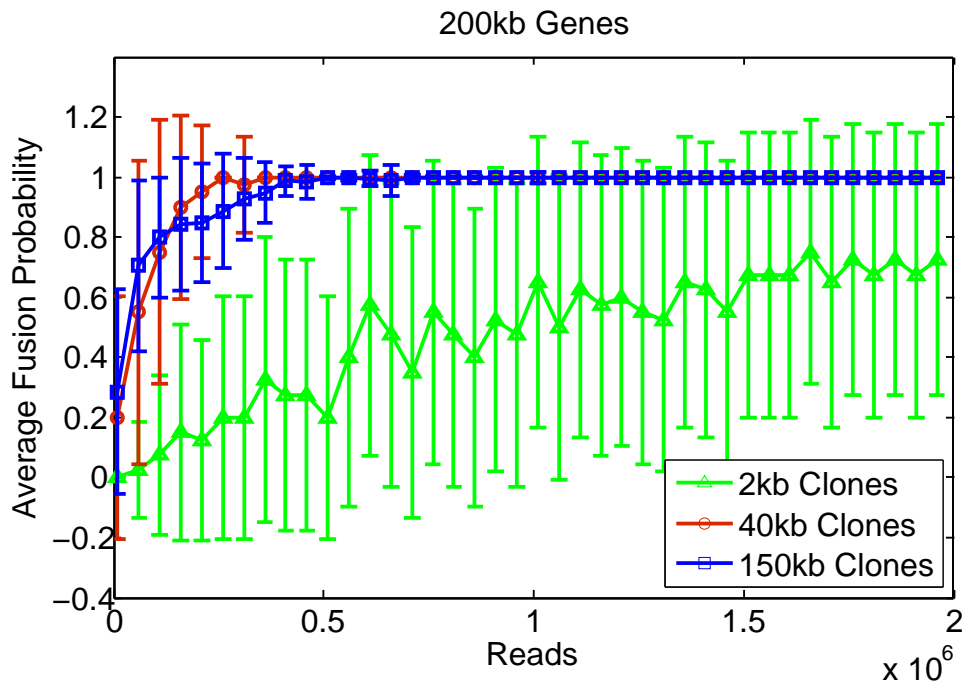

Figure 7: **Average fusion probability vs. number of mapped reads.** The average fusion probability with mean and standard deviations as a function of  $N$ , the number of mapped paired reads. The x-axis represents the number of clones sequenced,  $N$ . The simulated fusion genes were 200kb.
